# Supplementary material
Source: publisher figshare collection journal article supplement (https://acs.figshare.com/ndownloader/files/24771508)
Supplement: Supplementary file 1 [file 24771508]

Compound	SMILES	IC50/¦ÌM in MDA-MB-436	IC50/¦ÌM in Capan-1	IC50/¦ÌM in HCC1937	IC50/¦ÌM in 22RV1	IC50/¦ÌM in MDA-MB-468	IC50/¦ÌM in PC-3	IC50/¦ÌM in LNCaP	IC50/¦ÌM in SW620	IC50/¦ÌM in MDA-MB-231	DC50/nM in MDA-MB-436	DC50/nM in Capan-1	DC50/nM in HCC1937	DC50/nM in 22RV1	DC50/nM in MDA-MB-468	DC50/nM in PC-3	DC50/nM in LNCaP	DC50/nM in SW620	DC50/nM in MDA-MB-231
olaparib(5)	O=C1NN=C(CC2=CC=C(F)C(C(N3CCN(C(C4CC4)=O)CC3)=O)=C2)C5=CC=CC=C51	0.018 ¡À 0.003	0.027 ¡À 0.005	8.41 ¡À 1.91	12.30 ¡À 1.36	4.36 ¡À 1.25	5.14 ¡À 1.68	1.44 ¡À 0.41	5.13 ¡À 1.03	4.79 ¡À 1.59
6	O=C1NN=C(CC2=CC=C(F)C(C(N3CCN(C(CCCNC(COC4=CC=CC(C(N5C6CCC(NC6=O)=O)=O)=C4C5=O)=O)=O)CC3)=O)=C2)C7=CC=CC=C71	> 10	> 10
7	O=C1NN=C(CC2=CC=C(F)C(C(N3CCN(C(CCCCCNC(COC4=CC=CC(C(N5C6CCC(NC6=O)=O)=O)=C4C5=O)=O)=O)CC3)=O)=C2)C7=CC=CC=C71	9.4 ¡À 3.1	> 10
8	O=C1NN=C(CC2=CC=C(F)C(C(N3CCN(C(CCCNC(CCCNC(COC4=CC=CC(C(N5C6CCC(NC6=O)=O)=O)=C4C5=O)=O)=O)=O)CC3)=O)=C2)C7=CC=CC=C71	5.3 ¡À 1.9	> 10
9	O=C1NN=C(CC2=CC=C(F)C(C(N3CCN(C(CCCNC(CCCCCNC(COC4=CC=CC(C(N5C6CCC(NC6=O)=O)=O)=C4C5=O)=O)=O)=O)CC3)=O)=C2)C7=CC=CC=C71	1.9 ¡À 1.1	8.7 ¡À 2.9
10	O=C1NN=C(CC2=CC=C(F)C(C(N3CCN(C(CCCCCNC(CCCNC(COC4=CC=CC(C(N5C6CCC(NC6=O)=O)=O)=C4C5=O)=O)=O)=O)CC3)=O)=C2)C7=CC=CC=C71	1.2 ¡À 0.7	3.1 ¡À 1.2
11	O=C1NN=C(CC2=CC=C(F)C(C(N3CCN(C(CCCCCNC(CCCCCNC(COC4=CC=CC(C(N5C6CCC(NC6=O)=O)=O)=C4C5=O)=O)=O)=O)CC3)=O)=C2)C7=CC=CC=C71	0.95 ¡À 0.22	1.5 ¡À 0.4
12	O=C1NN=C(CC2=CC=C(F)C(C(N3CCN(C(CCCCCNC(CCCNC(CNC4=CC=CC(C(N5C6CCC(NC6=O)=O)=O)=C4C5=O)=O)=O)=O)CC3)=O)=C2)C7=CC=CC=C71	2.2 ¡À 1.3	7.1 ¡À 2.7
13	O=C1NN=C(CC2=CC=C(F)C(C(N3CCN(C(CCCCCNC(CCCCCNC(CNC4=CC=CC(C(N5C6CCC(NC6=O)=O)=O)=C4C5=O)=O)=O)=O)CC3)=O)=C2)C7=CC=CC=C71	1.7 ¡À 0.7	2.2 ¡À 0.9
14	O=C1NN=C(CC2=CC=C(F)C(C(N3CCN(C(CCCCC(NCCNC4=CC=CC(C(N5C6CCC(NC6=O)=O)=O)=C4C5=O)=O)=O)CC3)=O)=C2)C7=CC=CC=C71	> 10	> 10
15	O=C(NCCNC1=CC=CC(C(N2C3CCC(NC3=O)=O)=O)=C1C2=O)CCCCCCC(N(CC4)CCN4C(C5=CC(CC(C6=CC=CC=C67)=NNC7=O)=CC=C5F)=O)=O	0.83 ¡À 0.26	4.1 ¡À 1.8
16	O=C1NN=C(CC2=CC=C(F)C(C(N3CCN(C(CCCCCCCCC(NCCNC4=CC=CC(C(N5C6CCC(NC6=O)=O)=O)=C4C5=O)=O)=O)CC3)=O)=C2)C7=CC=CC=C71	0.123 ¡À 0.071	0.495 ¡À 0.089
17	O=C1NN=C(CC2=CC=C(F)C(C(N3CCN(C(CCCCCCCCCC(NCCNC4=CC=CC(C(N5C6CCC(NC6=O)=O)=O)=C4C5=O)=O)=O)CC3)=O)=C2)C7=CC=CC=C71	0.029 ¡À 0.008	0.264 ¡À 0.046
SK-575 (18)	O=C1NN=C(CC2=CC=C(F)C(C(N3CCN(C(CCCCCCCCCCC(NCCNC4=CC=CC(C(N5C6CCC(NC6=O)=O)=O)=C4C5=O)=O)=O)CC3)=O)=C2)C7=CC=CC=C71	0.019 ¡À 0.006	0.056 ¡À 0.012	2.32 ¡À 1.41	3.18 ¡À 1.58	1.68 ¡À 1.17	2.42 ¡À 0.90	0.803 ¡À 0.188	3.03 ¡À 1.02	3.96 ¡À 1.14	1.26	6.72	0.384	0.512	0.263	0.578	1.08	0.509	0.228
19	O=C1NN=C(CC2=CC=C(F)C(C(N3CCN(C(CCCCCCCCCCCC(NCCNC4=CC=CC(C(N5C6CCC(NC6=O)=O)=O)=C4C5=O)=O)=O)CC3)=O)=C2)C7=CC=CC=C71	0.021 ¡À 0.003	0.087 ¡À 0.019
20	O=C1NN=C(CC2=CC=C(F)C(C(N3CCN(C(CCCCCCCCCCCCC(NCCNC4=CC=CC(C(N5C6CCC(NC6=O)=O)=O)=C4C5=O)=O)=O)CC3)=O)=C2)C7=CC=CC=C71	0.025 ¡À 0.004	0.118 ¡À 0.021
21	O=C1NN=C(CC2=CC=C(F)C(C(N3CCN(C(CCCCCCCCCCC(NCCCCNC4=CC=CC(C(N5C6CCC(NC6=O)=O)=O)=C4C5=O)=O)=O)CC3)=O)=C2)C7=CC=CC=C71	0.039 ¡À 0.012	0.131 ¡À 0.034
22	O=C1N(C2CCC(NC2=O)=O)C(C3=C1C(NCCCCCCNC(CCCCCCCCCCC(N(CC4)CCN4C(C5=CC(CC(C6=CC=CC=C67)=NNC7=O)=CC=C5F)=O)=O)=O)=CC=C3)=O	0.042 ¡À 0.012	0.110 ¡À 0.013
23	O=C1NN=C(CC2=CC=C(F)C(C(N3CCN(C(CCCCCCCCCCC(NCCOCCNC4=CC=CC(C(N5C6CCC(NC6=O)=O)=O)=C4C5=O)=O)=O)CC3)=O)=C2)C7=CC=CC=C71	0.047 ¡À 0.018	0.120 ¡À 0.019
24	O=C1N(C2CCC(NC2=O)=O)C(C3=C1C(NCCOCCOCCNC(CCCCCCCCCCC(N(CC4)CCN4C(C5=CC(CC(C6=CC=CC=C67)=NNC7=O)=CC=C5F)=O)=O)=O)=CC=C3)=O	0.064 ¡À 0.021	0.134 ¡À 0.027
25	O=C1N(C2CCC(NC2=O)=O)C(C3=C1C(NCCCOCCOCCOCCCNC(CCCCCCCCCCC(N(CC4)CCN4C(C5=CC(CC(C6=CC=CC=C67)=NNC7=O)=CC=C5F)=O)=O)=O)=CC=C3)=O	0.065 ¡À 0.023	0.154 ¡À 0.039
26	O=C1NN=C(CC2=CC=C(F)C(C(N3CCN(C(CCCCCCCCCCC(NCCNC4=CC5=C(C(N(C6CCC(NC6=O)=O)C5=O)=O)C=C4)=O)=O)CC3)=O)=C2)C7=CC=CC=C71	0.035 ¡À 0.015	0.159 ¡À 0.035
27	O=C1NN=C(CC2=CC=C(F)C(C(N3CCN(C(CCCCCCCCCCC(NCCNC4=CC=CC5=C4CN(C6CCC(NC6=O)=O)C5=O)=O)=O)CC3)=O)=C2)C7=CC=CC=C71	0.092 ¡À 0.023	0.194 ¡À 0.031
28	O=C1NN=C(CC2=CC=C(F)C(C(N3CCN(C(CCCCCCCCCCC(NCCNC4=CC=CC(C(N5C6C(N(C)C(CC6)=O)=O)=O)=C4C5=O)=O)=O)CC3)=O)=C2)C7=CC=CC=C71
29	O=C1NN=C(CC2=CC=C(F)C(C(N3CCN(C(CCCCCCCCCCC(N[C@@H](C(C)(C)C)C(N4[C@H](C(NCC5=CC=C(C6=C(C)N=CS6)C=C5)=O)C[C@@H](O)C4)=O)=O)=O)CC3)=O)=C2)C7=CC=CC=C71	0.054 ¡À 0.011	0.087 ¡À 0.023
30	CC(N=CS1)=C1C2=CC=C(CNC([C@H]3N(C([C@@H](NC(CNC(CCCCCCCCCCC(N(CC4)CCN4C(C5=CC(CC(C6=CC=CC=C67)=NNC7=O)=CC=C5F)=O)=O)=O)=O)C(C)(C)C)=O)C[C@H](O)C3)=O)C=C2	1.2 ¡À 0.34	1.6 ¡À 0.39
31	O=C1NN=C(CC2=CC=C(F)C(C(N3CCN(C(CCCCCCCCCCC(NCCCC(N[C@@H](C(C)(C)C)C(N4[C@H](C(NCC5=CC=C(C6=C(C)N=CS6)C=C5)=O)C[C@@H](O)C4)=O)=O)=O)=O)CC3)=O)=C2)C7=CC=CC=C71	0.68 ¡À 0.11	0.87 ¡À 0.13
32	O=C1NN=C(CC2=CC=C(F)C(C(N3CCN(C(CCCCCCCCCCC(NCCCCCC(N[C@@H](C(C)(C)C)C(N4[C@H](C(NCC5=CC=C(C6=C(C)N=CS6)C=C5)=O)C[C@@H](O)C4)=O)=O)=O)=O)CC3)=O)=C2)C7=CC=CC=C71	0.12 ¡À 0.021	0.17 ¡À 0.033
3 (iRucaparib-AP6)	O=C1NCCC2=C(C3=CC=C(CN(C)CCOCCOCCOCCOCCOCCOCCNC4=CC=CC(C(N5C6CCC(NC6=O)=O)=O)=C4C5=O)C=C3)NC7=C2C1=CC(F)=C7	0.71 ¡À 0.12	0.95 ¡À 0.22
